# Supplementary material
Source: Springer Nature journal article supplement (https://www.springermedizin.de/resource/supplementary/13037_2012_141_MOESM1_ESM.pdf/9659424)
Supplement: MOESM1 [file 9659424]

# Shoulder Questionnaire

Please answer **each question** with exactly **one cross!**

## Range of motion

Date:

Sex:  male  female

Affected shoulder:  right  left  both shoulders

Dominant side:  right handed  left handed

Working  yes, as: \_\_\_\_\_ -

no, if no, because of the shoulder?  yes  no

Pensioner

Housewife

Do you take pain medication because of your affected shoulder?

yes if yes, which drugs: \_\_\_\_\_ -

no

For which shoulder do you complete the questionnaire?

right shoulder

left shoulder

### Flexion

Are you able to lift your stretched arm up to the depicted positions?

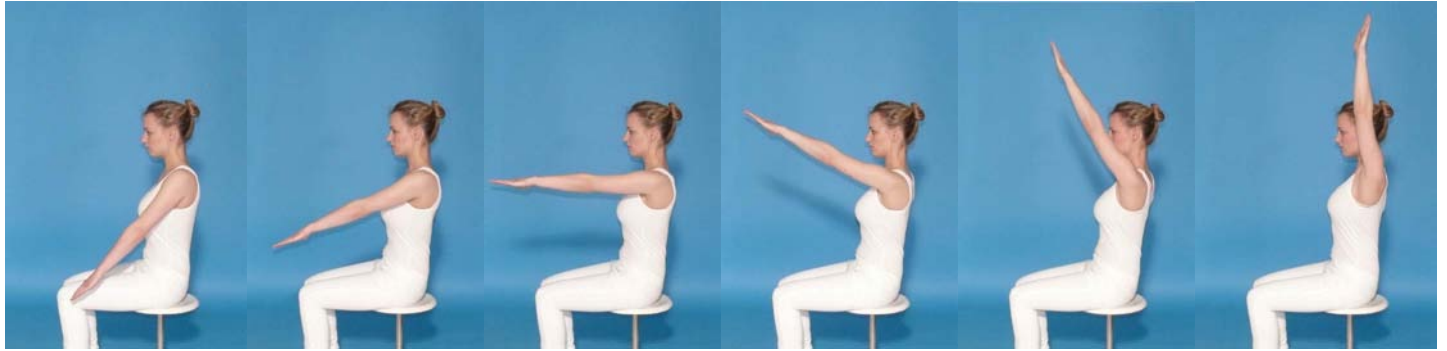

yes

yes

yes

yes

yes

yes

no

no

no

no

no

no

### Abduction

Are you able to lift your stretched arm up to the depicted positions?

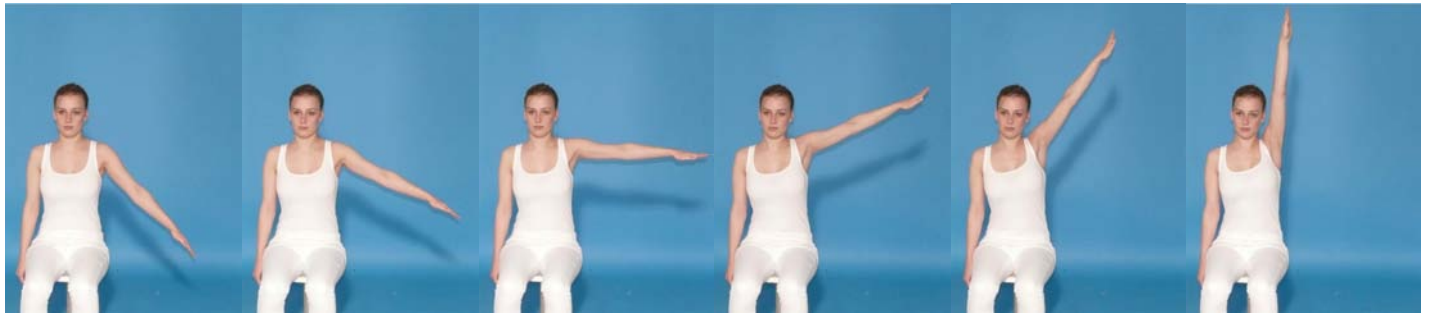

yes

yes

yes

yes

yes

yes

no

no

no

no

no

no

### Internal rotation

Up to which height of your back are you able to move the dorsum of your hand?

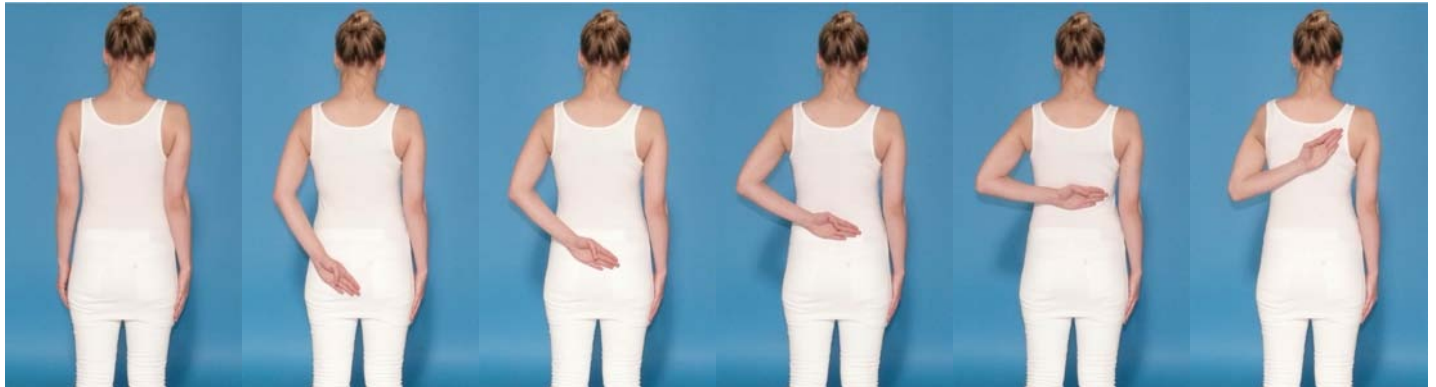

lateral thigh

buttock

tailbone

waistline

upper waist

shoulder blade

yes

yes

yes

yes

yes

yes

no

no

no

no

no

no

## Positioning

Up to which height are you able to put the palm of your hand?

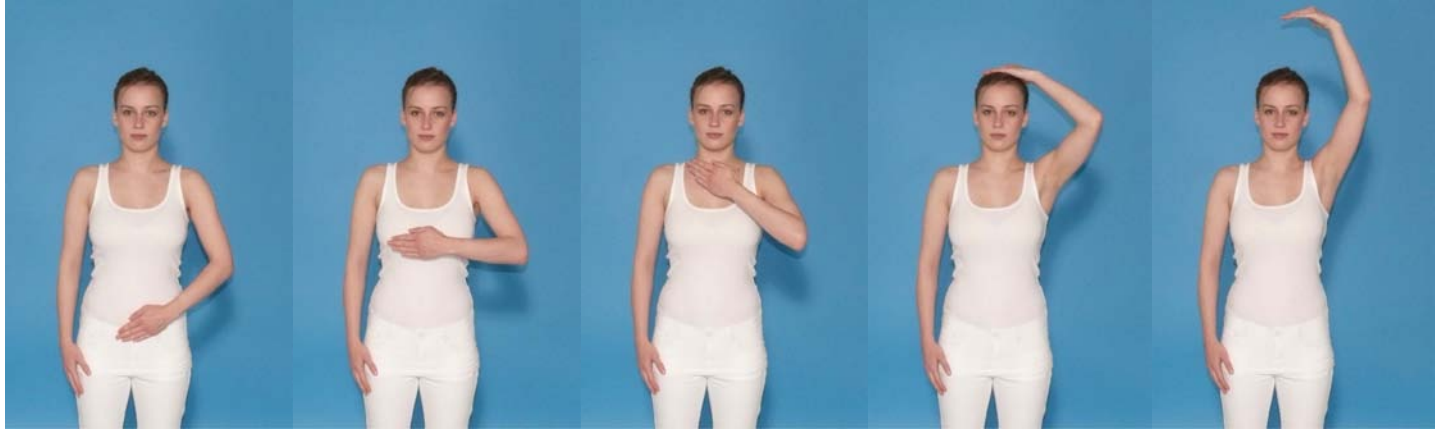

waistline

yes

no

chest

yes

no

neck

yes

no

top of head

yes

no

above head

yes

no

## External rotation

Please check exactly one box for each position shown for your affected side:

Are you able to....

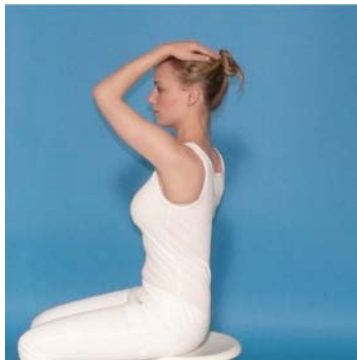

... put your hand on top of the head with the elbow directed forward

yes

no

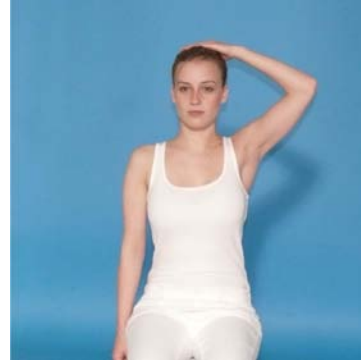

... put your hand on top of the head with the elbow held back

yes

no

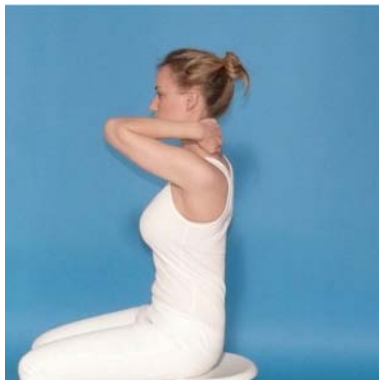

... put your hand in the neck with the elbow directed forward

yes

no

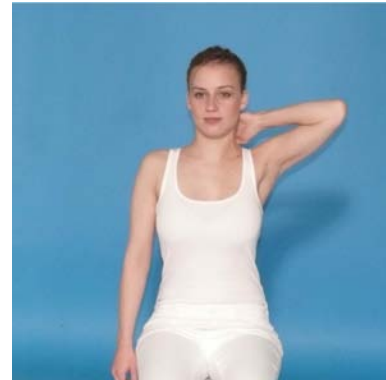

... put your hand in the neck with the elbow held back

yes

no

## Power of the shoulder:

To measure the power of your affected shoulder you need

- a firm carrier bag
- several objects of known weight  
e.g. coffee pack 17.6 ounce/ (500g),  
or milk tetra-pack 17.6 fluid ounce (500ml=500g)
- Please fill the bag stepwise with 17.6 ounce/ 500g weights, try to lift it according to the depicted position and **hold it for 5 seconds.**

front view:

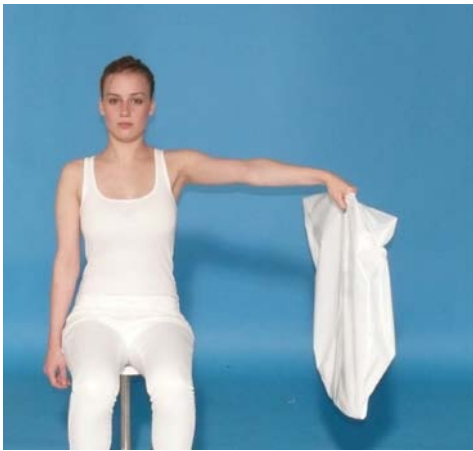

- arm elongated
- back of hand upward
- arm 90° elevation

top view:

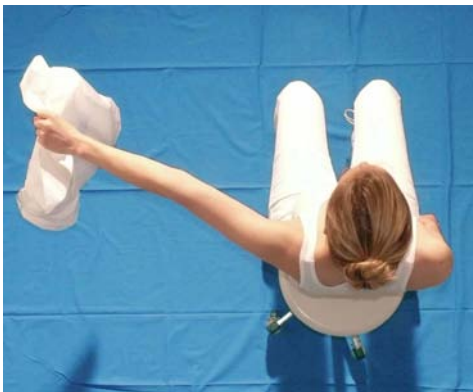

- arm should point about 20° forward

- What is the maximum weight you can lift for five seconds? \_\_\_\_\_, \_\_\_ kg  
\_\_\_\_\_, \_\_\_ ounce

## Pain

The following questions ask about pain in your affected shoulder without taking pain killers.

Please check exactly one box of each question that describes your pain best.

How severe was your pain at its worst in the last 14 days?

|                          |                          |                          |                          |                          |                          |
|--------------------------|--------------------------|--------------------------|--------------------------|--------------------------|--------------------------|
| none                     | little                   | moderate                 | strong                   | very strong              | intolerable              |
| <input type="checkbox"/> | <input type="checkbox"/> | <input type="checkbox"/> | <input type="checkbox"/> | <input type="checkbox"/> | <input type="checkbox"/> |

How severe is your average shoulder pain when you perform activities of the daily living?

|                          |                          |                          |                          |                          |                          |
|--------------------------|--------------------------|--------------------------|--------------------------|--------------------------|--------------------------|
| none                     | little                   | moderate                 | strong                   | very strong              | intolerable              |
| <input type="checkbox"/> | <input type="checkbox"/> | <input type="checkbox"/> | <input type="checkbox"/> | <input type="checkbox"/> | <input type="checkbox"/> |

How severe is your shoulder pain during work/ job?

|                          |                          |                          |                          |                          |                          |
|--------------------------|--------------------------|--------------------------|--------------------------|--------------------------|--------------------------|
| none                     | little                   | moderate                 | strong                   | very strong              | intolerable              |
| <input type="checkbox"/> | <input type="checkbox"/> | <input type="checkbox"/> | <input type="checkbox"/> | <input type="checkbox"/> | <input type="checkbox"/> |

How severe is your shoulder pain during recreational activities?

|                          |                          |                          |                          |                          |                          |
|--------------------------|--------------------------|--------------------------|--------------------------|--------------------------|--------------------------|
| none                     | little                   | moderate                 | strong                   | very strong              | intolerable              |
| <input type="checkbox"/> | <input type="checkbox"/> | <input type="checkbox"/> | <input type="checkbox"/> | <input type="checkbox"/> | <input type="checkbox"/> |

How severe is your shoulder pain during sleep?

|                          |                          |                          |                          |                          |                          |
|--------------------------|--------------------------|--------------------------|--------------------------|--------------------------|--------------------------|
| none                     | little                   | moderate                 | strong                   | very strong              | intolerable              |
| <input type="checkbox"/> | <input type="checkbox"/> | <input type="checkbox"/> | <input type="checkbox"/> | <input type="checkbox"/> | <input type="checkbox"/> |

Do you feel tingling (pins and needles) in your shoulder?

|                          |                          |                          |                          |                          |                          |
|--------------------------|--------------------------|--------------------------|--------------------------|--------------------------|--------------------------|
| none                     | little                   | moderate                 | strong                   | very strong              | intolerable              |
| <input type="checkbox"/> | <input type="checkbox"/> | <input type="checkbox"/> | <input type="checkbox"/> | <input type="checkbox"/> | <input type="checkbox"/> |

Please check exactly one box of each question that describes your situation best.

## Work & activities of daily living

Are you limited in your work/ profession/ principal activity as a result of your shoulder?

|                          |                          |                          |                          |                          |                          |
|--------------------------|--------------------------|--------------------------|--------------------------|--------------------------|--------------------------|
| none                     | little                   | moderate                 | strong                   | very strong              | intolerable              |
| <input type="checkbox"/> | <input type="checkbox"/> | <input type="checkbox"/> | <input type="checkbox"/> | <input type="checkbox"/> | <input type="checkbox"/> |

How much difficulty do you have putting on a pullover?

|                          |                          |                          |                          |                          |                          |
|--------------------------|--------------------------|--------------------------|--------------------------|--------------------------|--------------------------|
| none                     | little                   | moderate                 | strong                   | very strong              | intolerable              |
| <input type="checkbox"/> | <input type="checkbox"/> | <input type="checkbox"/> | <input type="checkbox"/> | <input type="checkbox"/> | <input type="checkbox"/> |

How much difficulty do you have putting on your pants?

none                      little                      moderate                      strong                      very strong                      intolerable

                            

How much difficulty do you have washing your back?

none                      little                      moderate                      strong                      very strong                      intolerable

                            

How much difficulty do you have carrying an object of approximately 5 kg/11lb sideways (e.g. shopping bag, briefcase)?

none                      little                      moderate                      strong                      very strong                      intolerable

                            

How much difficulty do you have washing or combing your hair?

none                      little                      moderate                      strong                      very strong                      intolerable

                            

How much difficulty do you have placing an object on a shelf above your head?

none                      little                      moderate                      strong                      very strong                      intolerable

                            

How much difficulty do you have to push open a heavy door?

none                      little                      moderate                      strong                      very strong                      intolerable

                            

How much difficulty do you have to manage toileting?

none                      little                      moderate                      strong                      very strong                      intolerable

                            

### Recreational activities/ sports

How much difficulty do you have doing easy household chores (e.g. cutting fruits, writing, ironing, turn a key)?

none                      little                      moderate                      strong                      very strong                      intolerable

How much difficulty do you have doing medium heavy household chores (e.g. cleaning basin, scrubbing pots or pans, washing your clothes by hand)?

none                      little                      moderate                      strong                      very strong                      intolerable

                            

How much difficulty do you have doing heavy household chores (e.g. shovelling snow, moving the lawn)?

none                      little                      moderate                      strong                      very strong                      intolerable

                            

How much difficulty do you have throwing a light ball over your head?

none                      little                      moderate                      strong                      very strong                      intolerable

                            

How much difficulty do you have to participate in easy sports (e.g. miniature golf, bowling, boccia, frisbee)?

none                      little                      moderate                      strong                      very strong                      intolerable

                            

How much difficulty do you have to participate in heavy sports (e.g. swimming, golf, volleyball, tennis)?

none                      little                      moderate                      strong                      very strong                      intolerable

                            

## Social life

How much difficulty do you have to use public transportation (bus, metro)?

none                      little                      moderate                      strong                      very strong                      intolerable

                            

To what extent does your shoulder interfere with your normal social activities with family, friends, neighbours or groups?

none                      little                      moderate                      strong                      very strong                      intolerable

                            

Do you feel less capable, less confident or less useful because of your shoulder problem?

never                      rarely                      sometimes                      often                      very often                      always

                            

**Thank you very much for your efforts!**
